# Supplementary material
Source: Springer Nature journal article supplement (https://mijn.bsl.nl/resource/supplementary/13047_2009_104_MOESM6_ESM.pdf/7109786)

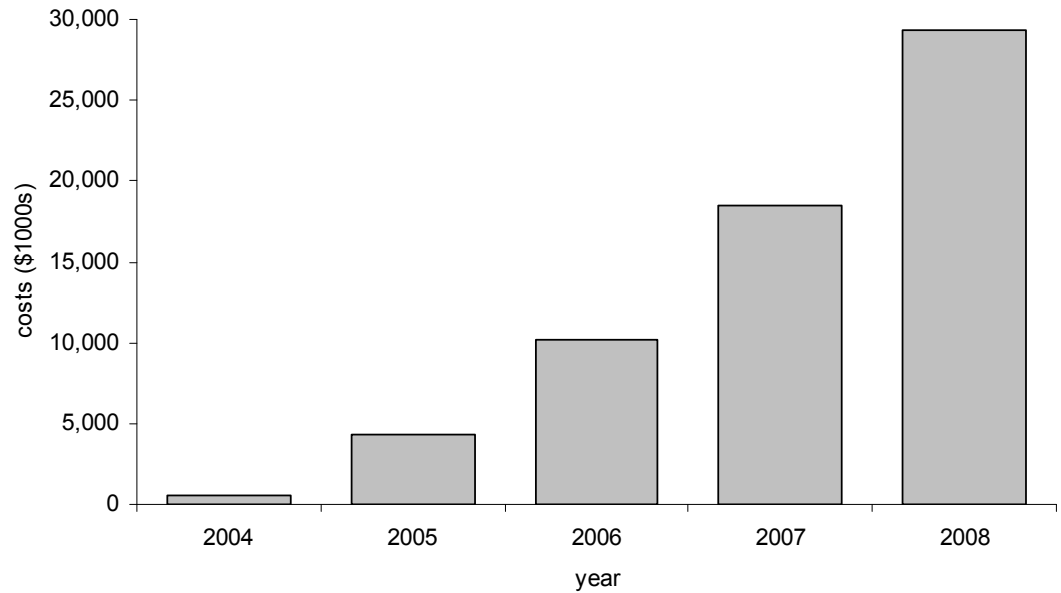

Supplement: MOESM6 [file 7109786]
